# Supplementary material for: Effect of surfactants on the molecular mobility and crystallization kinetics of hesperetin
Source: Royal Society of Chemistry journal article supplement (doi:10.1039/c9ce00118b), 2019-01-01
Supplement: c9ce00118b1.pdf [file c9ce00118b1.pdf]

1

## Supplementary information

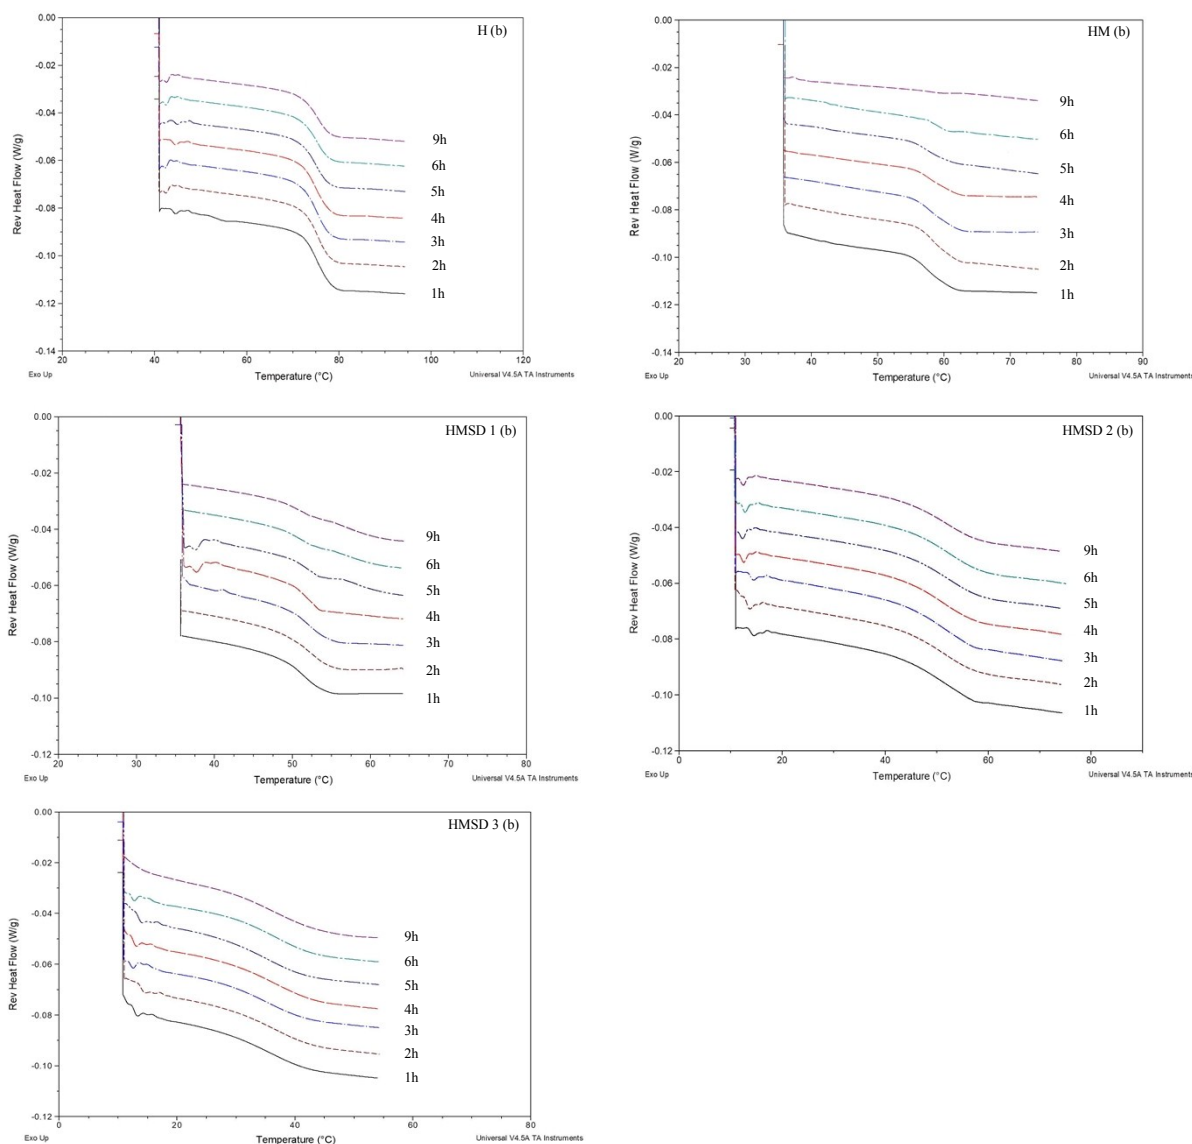

2

3 Fig. S1. mDSC heating curves of samples H (b), HM (b), HMSD 1 (b), HMSD 2 (b) and, HMSD 3 (b) at all  
4 time points. The step change in the reversing heat flow (vertical axis) shows the  $T_g$  of hesperetin.

5 Section S1. Modelling and statistical analysis

6 One-way analysis of variance (ANOVA) with post-hoc Tukey's HSD test was used to compare the  
7 significant differences of  $\alpha(t)$  values of all samples at the same time points. Here, ANOVA was used  
8 because there were more than two independent (categorical) variables i.e. amorphous samples [H (b),  
9 HM (b), HMSD 1-3 (b)] and one dependent (continuous) variable i.e., time. ANOVA test only  
10 suggested that one or more samples or variables were significantly different. The post-hoc test  
11 identifies which of the pairs of samples or variables are significantly different from each other.

12 Tukey's HSD (Honest significant

1 difference) test is one of the ANOVA post-hoc tests to identify the significant difference amongst samples. Table 1S shows the pair-wise analysis of  $\alpha(t)$   
 2 values of all samples at all time points. Maximum differences were observed at 4h amongst the samples. The data for sample H (b) and HM (b) are  
 3 significantly different than all other samples (Table S1). However, HMSD 1-3 (b) samples are significantly different from each other only at some of the time  
 4 points.

5 Table S1. A pair-wise comparison of  $\alpha(t)$  of all samples at all time points using ANOVA with post-hoc tukey's test.

| Time points (h) | H (b) vs. HM (b) | H (b) vs. HMSD 1 (b) | H (b) vs. HMSD 2 (b) | H (b) vs. HMSD 3 (b) | HM (b) vs. HMSD 1 (b) | HM (b) vs. HMSD 2 (b) | HM (b) vs. HMSD 3 (b) | HMSD 1 (b) vs. HMSD 2 (b) | HMSD 1 (b) vs. HMSD 3 (b) | HMSD 2 (b) vs. HMSD 3 (b) |
|-----------------|------------------|----------------------|----------------------|----------------------|-----------------------|-----------------------|-----------------------|---------------------------|---------------------------|---------------------------|
| 0               | -                | -                    | -                    | -                    | -                     | -                     | -                     | -                         | -                         | -                         |
| 1               | **               | *                    | **                   | **                   | **                    | -                     | **                    | -                         | -                         | -                         |
| 2               | **               | *                    | *                    | *                    | *                     | **                    | *                     | -                         | **                        | -                         |
| 3               | **               | *                    | **                   | *                    | **                    | **                    | *                     | -                         | *                         | **                        |
| 4               | **               | **                   | **                   | **                   | **                    | **                    | **                    | **                        | **                        | -                         |
| 5               | *                | *                    | **                   | *                    | **                    | -                     | -                     | -                         | -                         | -                         |
| 6               | **               | *                    | **                   | **                   | **                    | *                     | **                    | -                         | -                         | -                         |
| 9               | *                | *                    | *                    | *                    | *                     | *                     | *                     | -                         | *                         | *                         |

6 \*Significance level is  $\leq 0.01$

7 \*\*Significance level is  $\leq 0.05$

8 - No significant difference

9 Nucleation models are based on certain mechanistic assumptions of solid-state reactions. Avrami-Erofeyev (A) models assumes that nucleation is a uniform  
 10 and random process and nuclei growth occurs continuously considering certain restrictions such as ingestion and coalescence. Avrami-Erofeyev (A) models  
 11 are commonly known as JMAK (John-Mehl-Avrami-Kolmogorov) models. Prout-Trompkins (B1) models are autocatalytic models which mean the products  
 12 catalyze the reaction and this occurs when the reactants are regenerated during the reaction (called as 'branching'). Table S2 shows the entire data fitted to  
 13 various nucleation models including Avrami-Erofeyev (A) and Prout-Trompkins (B1) models. All the Avrami plots generated from this data passed the  
 14 normality test (p value  $> 0.05$ ).

15

16

1 Table S2. Model fitting of the isothermal crystallization kinetics data for H (b), HM (b) and HMSD 1-3 (b) samples.

|                    | H (b)  |        |        |        | HM (b) |        |        |        | HMSD 1 (b) |        |        |        | HMSD 2 (b) |        |        |        | HMSD 3 (b) |        |        |        |
|--------------------|--------|--------|--------|--------|--------|--------|--------|--------|------------|--------|--------|--------|------------|--------|--------|--------|------------|--------|--------|--------|
|                    | (A2)   | (A3)   | (A4)   | (B1)   | (A2)   | (A3)   | (A4)   | (B1)   | (A2)       | (A3)   | (A4)   | (B1)   | (A2)       | (A3)   | (A4)   | (B1)   | (A2)       | (A3)   | (A4)   | (B1)   |
| R <sup>2</sup>     | 0.98   | 0.96   | 0.96   | 0.96   | 0.87   | 0.86   | 0.85   | 0.87   | 0.94       | 0.92   | 0.92   | 0.95   | 0.92       | 0.90   | 0.90   | 0.93   | 0.96       | 0.97   | 0.98   | 0.93   |
| Adj R <sup>2</sup> | 0.97   | 0.96   | 0.95   | 0.96   | 0.84   | 0.83   | 0.82   | 0.85   | 0.93       | 0.91   | 0.90   | 0.94   | 0.90       | 0.88   | 0.88   | 0.92   | 0.95       | 0.97   | 0.97   | 0.91   |
| Normality test     | Passed     | Passed | Passed | Passed | Passed     | Passed | Passed | Passed | Passed     | Passed | Passed | Passed |
| PRESS              | 0.05   | 0.04   | 0.03   | 0.86   | 0.51   | 0.25   | 0.14   | 5.46   | 0.34       | 0.16   | 0.09   | 3.02   | 0.51       | 0.22   | 0.13   | 4.72   | 0.19       | 0.04   | 0.02   | 4.85   |
| Power              | 1.00   | 1.00   | 0.99   | 1.00   | 0.92   | 0.90   | 0.89   | 0.92   | 0.99       | 0.98   | 0.97   | 0.99   | 0.97       | 0.96   | 0.95   | 0.98   | 0.98       | 0.99   | 0.99   | 0.93   |
| AICc               | -41.72 | -43.61 | -45.79 | -21.48 | -24.47 | -29.68 | -33.45 | -8.01  | -27.47     | -33.04 | -36.92 | -12.08 | -24.39     | -30.50 | -34.70 | -8.44  | -30.16     | -40.55 | -46.39 | -7.73  |
| BIC                | -42.58 | -44.46 | -46.65 | -22.33 | -25.32 | -30.54 | -34.31 | -8.87  | -28.32     | -33.89 | -37.78 | -12.94 | -25.25     | -31.35 | -35.55 | -9.29  | -31.01     | -41.41 | -47.25 | -8.59  |

2
